# Supplementary material for: Community Dynamics in the Mouse Gut Microbiota: A Possible Role for IRF9-Regulated Genes in Community Homeostasis
Source: PubMed Central journal article supplement (PMC2859068; doi:10.1371/journal.pone.0010335), 2010-04-23
Supplement: pone.0010335.s001.pdf [file pone.0010335.s001.pdf]

**Table S1** Faecal sample collection from four mouse strains

| <i>Background</i>  | <i>BALB/c</i>    |   |   |   |   | <i>C57BL/6</i>               |   |   |   |   |                 |   |   |   |   |                |   |   |   |
|--------------------|------------------|---|---|---|---|------------------------------|---|---|---|---|-----------------|---|---|---|---|----------------|---|---|---|
| <i>Strain</i>      | <b>Wild Type</b> |   |   |   |   | <b>Wild Type<sup>1</sup></b> |   |   |   |   | <b>STAT1 KO</b> |   |   |   |   | <b>IRF9 KO</b> |   |   |   |
| <i>Individual</i>  | A                | B | C | D | E | F                            | G | H | I | J | K               | L | M | N | O | P              | Q | R | S |
| <i>Litter/Cage</i> | 1                | 1 | 1 | 1 | 1 | 2                            | 2 | 2 | 2 | 2 | 3               | 3 | 3 | 3 | 3 | 4              | 4 | 5 | 5 |
| <i>Day</i> 0       |                  |   |   |   |   |                              |   |   |   |   |                 |   |   |   |   |                |   |   |   |
| 1                  |                  |   |   |   |   |                              |   |   |   |   |                 |   |   |   |   |                |   |   |   |
| 2                  |                  |   |   |   |   |                              |   |   |   |   |                 |   |   |   |   |                |   |   |   |
| 3                  |                  |   |   |   |   |                              |   |   |   |   |                 |   |   |   |   |                |   |   |   |
| 4                  |                  |   |   |   |   |                              |   |   |   |   |                 |   |   |   |   |                |   |   |   |
| 5                  |                  |   |   |   |   |                              |   |   |   |   |                 |   |   |   |   |                |   |   |   |
| 6                  |                  |   |   |   |   |                              |   |   |   |   |                 |   |   |   |   |                |   |   |   |
| 7                  |                  |   |   |   |   |                              |   |   |   |   |                 |   |   |   |   |                |   |   |   |
| 8                  |                  |   |   |   |   |                              |   |   |   |   |                 |   |   |   |   |                |   |   |   |
| 9                  |                  |   |   |   |   |                              |   |   |   |   |                 |   |   |   |   |                |   |   |   |
| 10                 |                  |   |   |   |   |                              |   |   |   |   |                 |   |   |   |   |                |   |   |   |
| 11                 |                  |   |   |   |   |                              |   |   |   |   |                 |   |   |   |   |                |   |   |   |
| 12                 |                  |   |   |   |   |                              |   |   |   |   |                 |   |   |   |   |                |   |   |   |
| 13                 |                  |   |   |   |   |                              |   |   |   |   |                 |   |   |   |   |                |   |   |   |
| 14                 |                  |   |   |   |   |                              |   |   |   |   |                 |   |   |   |   |                |   |   |   |
| 15                 |                  |   |   |   |   |                              |   |   |   |   |                 |   |   |   |   |                |   |   |   |
| 16                 |                  |   |   |   |   |                              |   |   |   |   |                 |   |   |   |   |                |   |   |   |
| 17                 |                  |   |   |   |   |                              |   |   |   |   |                 |   |   |   |   |                |   |   |   |
| 18                 |                  |   |   |   |   |                              |   |   |   |   |                 |   |   |   |   |                |   |   |   |
| 19                 |                  |   |   |   |   |                              |   |   |   |   |                 |   |   |   |   |                |   |   |   |
| 20                 |                  |   |   |   |   |                              |   |   |   |   |                 |   |   |   |   |                |   |   |   |

<sup>1</sup>The same individuals were sampled twice; at 10 weeks and 17 weeks of age. Samples were collected every 5 days initially and then daily from day 15. Samples collected at day 20 were used for both 5 day and daily sample sets.
